# Supplementary material for: Physiological Characteristics and Comparative Secretome Analysis of Morchella importuna Grown on Glucose, Rice Straw, Sawdust, Wheat Grain, and MIX Substrates
Source: Front Microbiol. 2021 May 25;12:636344. doi: 10.3389/fmicb.2021.636344 (PMC8185036; doi:10.3389/fmicb.2021.636344)
Supplement: Supplementary file 3 [file Table_1.XLSX]

## Sheet: Sheet1
Gene No.	Primer name	Primer sequence(5'→3')	Product size（bp）	Tm (℃)
MIM04M26Gene03003	03003F	GGTGATGGTGACAACCGCTA	157	60.04
	03003R	TGCCATCGGAGGTGATGAAC		60.11
MIM04M26Gene06550	06550F	ACGAATGGACGCTATGCCAA	263	60.11
	06550R	GGCACCATGCAAGTCAATCC		59.83
MIM04M26Gene01313	01313F	CAGGATGGAGATTGACCCCG	240	59.89
	01313R	GCGGCAATGGACTGGTAGAA		60.39
MIM04M26Gene05305	05305F	AGGTGCCTTCCTTCACTTGG	155	59.89
	05305R	GTTTGAAGCCAGAGCAGCAC		60.04
MIM04M26Gene08639	08639F	TAGAAGTCGGGAACGGCAAC	164	60.04
	08639R	GTCTTGGTTGAAGGCGAGGA		59.97
MIM04M26Gene10621	10621F	TCAGTGACGCTGCATACGAA	219	59.76
	10621R	CGGTGATTGCAGAGACCCAT		60.11
MIM04M26Gene11386	11386F	GGTCAAGGCGGACAAGATGA	176	60.04
	11386R	CACCCCAAACTTCCAATGCG		60.04
MIM04M26Gene10805	10805F	CGTAAAGGATCAGCTCGCCT	164	59.9
	10805R	TCATATCTGTGGTGCTCGGC		59.9
MIM04M26Gene03491	03491F	GGGTCACCTCTCCCAACATC	183	59.75
	03491R	TGTGTAGGGAGTGACGAGGT		59.89
MIM04M26Gene09511	09511F	ATCCGACGTTCAATAGGGGC	228	59.89
	09511R	AGTCGCAGAAGTTGGTAGGC		60.04
MIM04M26Gene04043	04043F	TCTGCGGCTTCAGTCTTGAG	245	60.04
	04043R	ACAGACTCGGGGACTTCGTA		59.96
MIM04M26Gene05979	05979F	CAGCAGCCTTCAACACCAAC	200	59.97
	05979R	GACGAGATAGGTTCCAGCGG		59.97
MIM04M26Gene09883	09883F	TTGACCGTTGGGAGTCTGTG	242	59.89
	09883R	ACCAAAACATAGCCCCTCGG		60.03
MIM04M26Gene11112	11112F	CTGACCACCCACAACGACTT	273	60.18
	11112R	CATGTTGGCGACGGACTTTG		60.11
MIM04M26Gene00523	00523F	TGAGATTACTCGTGTCGCCG	257	59.9
	00523R	TTGTAGGGAAGTCAGCAGCG		60.04
MIM04M26Gene02008	02008F	TCGCGGTCAAGTGTATCGAG	298	59.9
	02008R	TCTGCCAATCCCTCGACAAG		59.75
MIM04M26Gene08278	08278F	GATGGGTGCGGACGAAGTAT	178	59.9
	08278R	GGGGTTGTTGTTGACGAAGC		59.97
MIM04M26Gene10651	10651F	GGTCACAACTGCCCTCGTAA	276	59.97
	10651R	TGCCAGCAGAAAGTCACGAT		59.96
MIM04M26Gene01808	01808F	TTTTGGGACCAGCAATGGGT	191	60.11
	01808R	GGCGCTTTGTCGGAAATGTT		60.04
MIM04M26Gene06474	06474F	CAGTGGTGCAACGTCAAAGG	158	59.97
	06474R	GCCGAAACGCACATCTCATC		59.97
MIM04M26Gene07177	07177F	CTTACATTCGCAGCCCTCCT	288	59.82
	07177R	GAGTATCGACGGCCCATGTT		59.9
MIM04M26Gene09935	09935F	GAGGAGAACTATGGCGACCG	201	59.97
	09935R	TGAGTTCCCGCTTTCCTGAC		59.97
MIM04M26Gene10806	10806F	ACCGCTTCACCAGCCTTATC	207	60.11
	10806R	CGTGGTAGATGGGTTGGTCC		60.11
MIM04M26Gene07860	07860F	CGCACGGTTGATTGGTTTGT	223	59.97
	07860R	TTTCTACCGACGTTCCCGTG		60.04
MIM04M26Gene02878	02878F	TGACGGGTGTTGGTATGTGG	159	59.96
	02878R	AGGAGATTGCTTGCAGGACC		60.03
MIM04M26Gene05691	05691F	ACGGGTTCTTGATCGGCAAT	138	60.04
	05691R	CGAAGATGTGGTTGGCTCCT		60.04
MIM04M26Gene00528	00528F	TTTCCCAGGACGCGAATACC	148	60.11
	00528R	AATGCAGTTGAGACCGAGGG		60.04
MIM04M26Gene01582	01582F	TATCACAAACAGCGGTGCCT	172	59.96
	01582R	GCTTACGGGGTCATACTCGG		59.97
MIM04M26Gene00707	00707F	GCTTGACCTCCTTGCCTCTT	270	59.96
	00707R	CTGTAAGGTGGGCGCATGTA		60.11
MIM04M26Gene08638	08638F	CCCGCCTTCCAAAACCTACA	129	60.25
	08638R	TCCGTTCTGAGAGCAGCAAG		60.04
MIM04M26Gene07830	07830F	CCAACCTGATGTCCTCCACC	236	60.04
	07830R	AGAACCGCCAATGTAGCCAA		59.96
MIM04M26Gene06894	06894F	TTCAACGGCGAGGATGTGAA	218	59.97
	06894R	TTCTCGGGTGTAGTCAACGC		60.04
MIM04M26Gene03737	03737F	AGCAGCACCTACAACATCGT	140	59.68
	03737R	GCGGAGTAGTAGACGGATGC		60.04
MIM04M26Gene03149	03149F	CGGCGCTGAATATCCCTCTT	188	59.97
	03149R	CAAAGCGTCAACCACCGAAG		60.04
MIM04M26Gene06324	06324F	GATGGTATCGGTGTCCAGGC	206	60.25
	06324R	CTTGGCACACTTACACACGC		60.04
MIM04M26Gene06674	06674F	AAGAATACGGCTGGCTCACC	209	60.11
	06674R	CTCCGCATCGTCCAGGTAAA		59.83
MIM04M26Gene02615	02615F	AGCAGACCCCTCTTCAAAGC	164	59.96
	02615R	ACTCTCCGTTGTAGCAAGGC		60.04
MIM04M26Gene01643	01643F	TTTCCGGGCTCTGCAAGAAT	273	59.96
	01643R	GCAAGGAAAGTGTCGTGCTG		60.04
MIM04M26Gene04737	04737F	CATTGCATGGCACGTCTCTG	128	59.9
	04737R	AGGCGTCGTAAGTGTTCCAG		60.04
MIM04M26Gene10770	10770F	AACGGAATTGATGCGGGAGT	244	60.04
	10770R	TGGGGGAGACGATATGGGTT		60.03
MIM04M26Gene08997	08997F	AACCCTCAGAATGGGCAAGG	136	59.96
	08997R	AGACACTTGCGGATGGTTGT		59.89
MIM04M26Gene02465	02465F	CAGTTCTGTTGCTGTTGCCG	263	60.32
	02465R	GGCAGTGAACACCCTCAGTT		60.18
MIM04M26Gene03039	03039F	CAGCTCACTTCAGTCCTCGTT	287	60
	03039R	CAGCTTCCGAGACAGTGGAC		60.39
MIM04M26Gene00759	00759F	TGGCACAGAGGTTGATCTCG	214	59.75
	00759R	GTTCCCATACCCCGCATTCT		59.82
MIM04M26Gene02058	02058F	TGTCCTCAAGTCCAACACGG	239	59.89
	02058R	TGGGGACGAGGATGTTGTTG		59.96
MIM04M26Gene03266	03266F	GAGCCAACCGCATCAAGTTC	205	59.83
	03266R	TCTGGGTCGGTTCCTGAGAT		59.96
MIM04M26Gene09512	09512F	TGTCCTCGCTCGTCAACTTC	241	60.04
	09512R	AGAATGGGGATACCACGGGA		60.03
MIM04M26Gene04100	04100F	TGTCCAGTCTCTTCCGCAAC	206	59.97
	04100R	GGTGGCATACTCCTTGAGCA		59.75
MIM04M26Gene11143	11143F	GTGTAGAACCGCAGGTGTCA	207	59.97
	11143R	GAGGGGAACTCGAAAGTGGG		60.04
MIM04M26Gene04221	04221F	TGTATTCGAGCGTGCTGGTT	129	60.04
	04221R	AATTCTGGCCTGTCCGTGTT		59.89
MIM04M26Gene11695	11695F	ACACGATCCAAAGAGCCTGG	131	60.04
	11695R	TGAGTTTCACGCAGTCTCCC		59.97
Internal reference gene	INTF2F	AGATTCCGTAAAAGCGGGGG	238	60.11
	INTF2R	GCGCATTAACCGAGTGCAAA		60.11
